# Supplementary material
Source: PubMed Central journal article supplement (PMC4518275)
Supplement: ncomms8728-s1.pdf [file ncomms8728-s1.pdf]

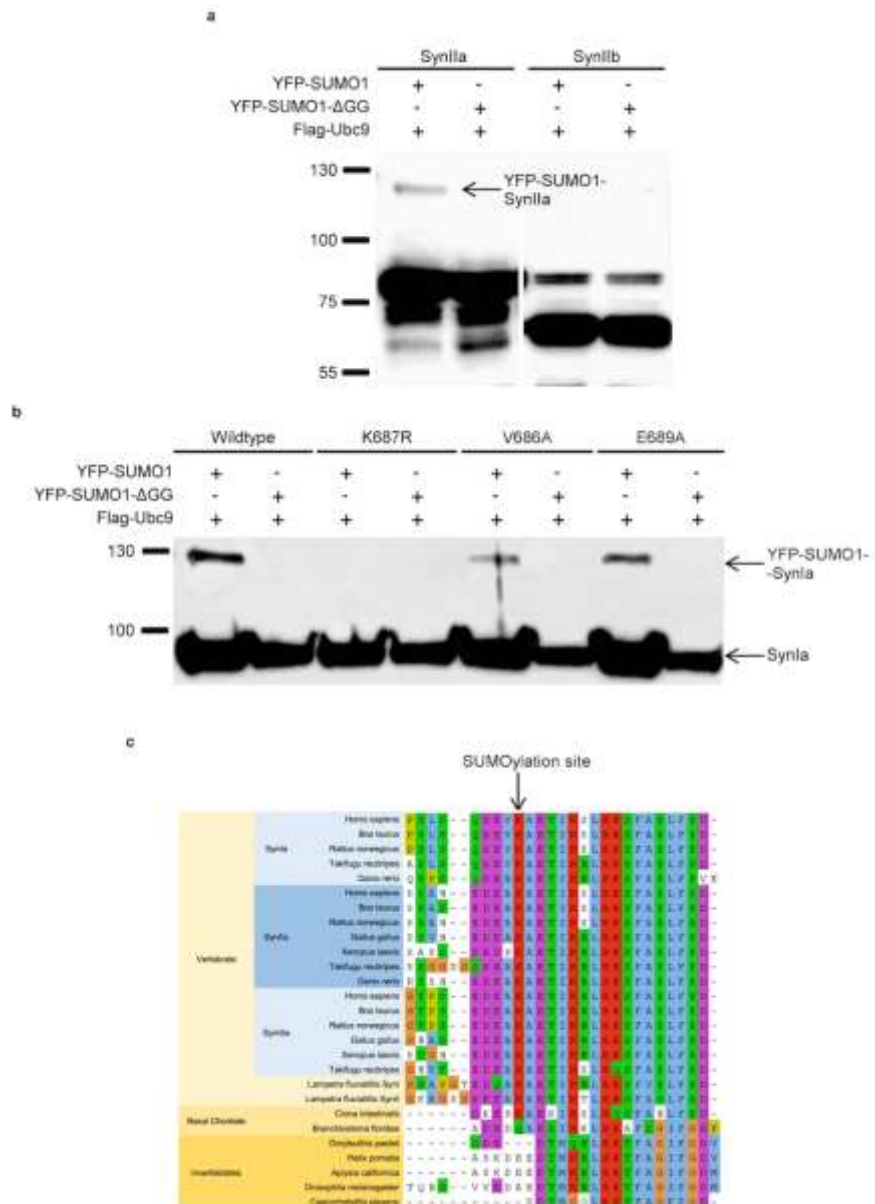

## Supplementary Figure 1

### Possible SUMOylation of other Synapsin isoforms

**a)** Representative immunoblot showing that SynIIa, but not SynIIb, is robustly SUMOylated in N2A SUMOylation assay.

**b)** Representative immunoblot showing that SynIIa V686A and E689A mutant can be SUMOylated at a lower level in N2A SUMOylation assay.

Immunoblots were obtained through anti-HA western blot of N2A lysate described in figure 1a.

**c)** Sequence alignment of the Synapsin E domains generated in UGENE using ClustalX algorithm and colour coded to highlight the conserved SUMOylation site in vertebrates.

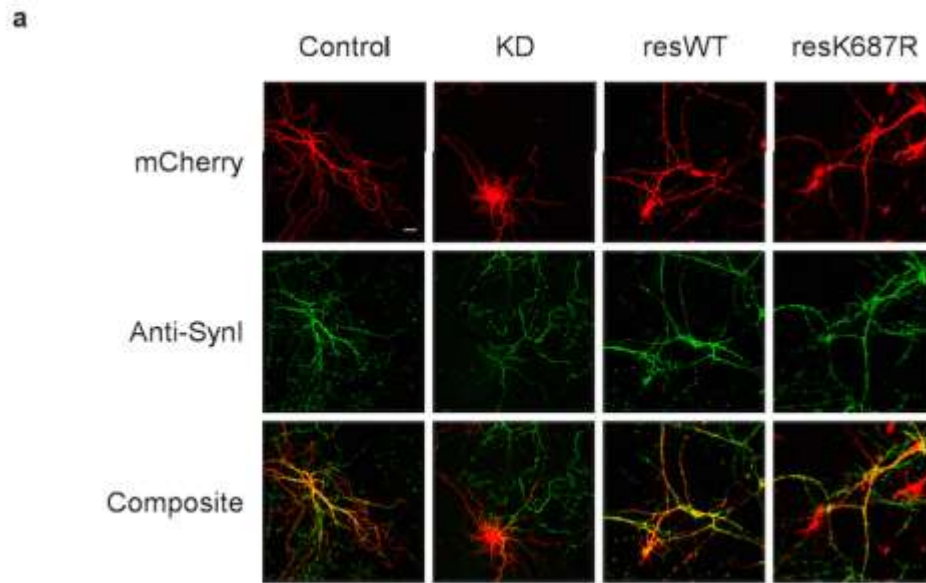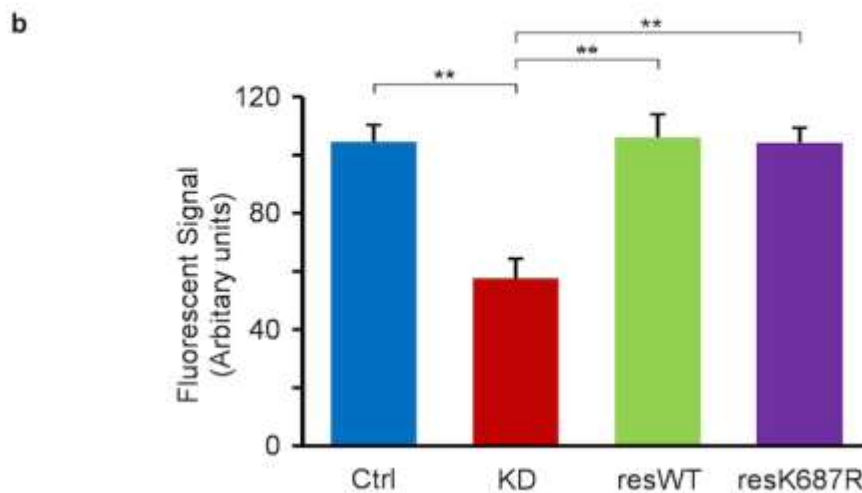

**Supplementary Figure 2**

**SynI expression levels in knockdown and molecular replacement experiments.**

**a)** Representative images of hippocampal neurons transfected with Control (n=9), SynIa knockdown (KD) (n=10), KD-rescue with GFP-SynIa WT (n=9) or KD-rescue with GFP-SynIa K687R (n=9). Cells were fixed and immunostained with anti-SynI antibody (with Cy2 secondary). Scale bar = 5  $\mu$ m.

**b)** Quantification of the level of anti-SynI antibody immunofluorescence in mCherry positive neurons. Quantification was performed using the mCherry signal to delineate region of interest. The average level of Cy2 signal within the ROI was then measured. All Cy2 signals are imaged with the same settings. The data are presented as mean  $\pm$  SEM. \*\* p<0.01, one-way ANOVA, post-hoc test with Bonferroni correction. n numbers as in (a).

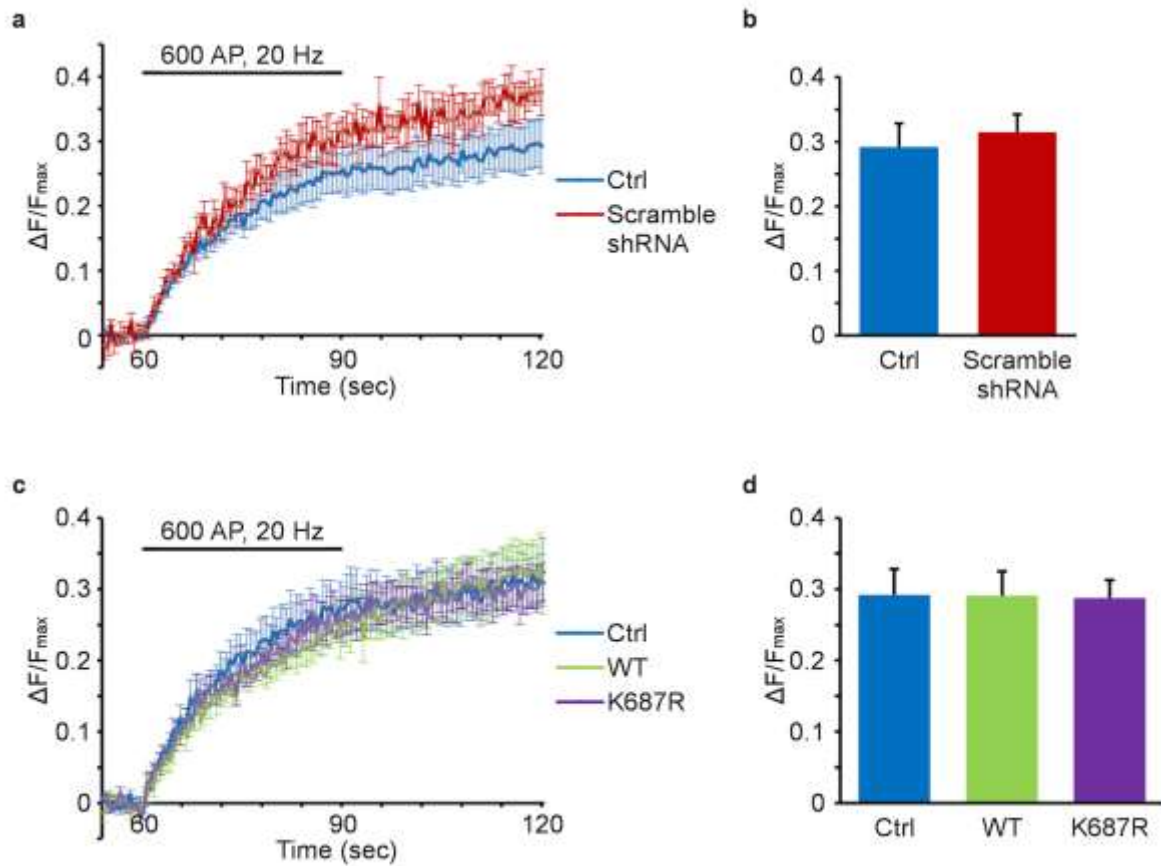

### Supplementary Figure 3

**Use of scramble shRNA or expression of Synla WT or K687R under non-knockdown background does not change the overall exocytosis.**

**a)** SypHy exocytosis assay on mCherry Control (Ctrl, n=8) and scrambled shRNA mCherry control (Scramble shRNA, n=7). SypHy fluorescence data were normalized to the maximum SypHy signal obtained after  $\text{NH}_4\text{Cl}$  application ( $\Delta F/F_{max}$ ) and plotted as the mean  $\pm$  SEM.

**b)** Quantification of data shown in **a)** plotted as the mean  $\pm$  SEM of the average  $\Delta F/F_{max}$  t = 90 – 100. No significant differences were observed, unpaired Student's t-test

**c)** SypHy exocytosis assay on mCherry Control (Ctrl, n=8), Synla wildtype overexpression (WT, n=8) and Synla K687R overexpression (K687R, n=10). SypHy fluorescence data were normalized to the maximum SypHy signal obtained after  $\text{NH}_4\text{Cl}$  application ( $\Delta F/F_{max}$ ) and plotted as the mean  $\pm$  SEM.

**d)** Quantification of data shown in **c)** plotted as the mean  $\pm$  SEM of the average  $\Delta F/F_{max}$  t = 90 – 100. No significant differences were observed, one-way ANOVA.

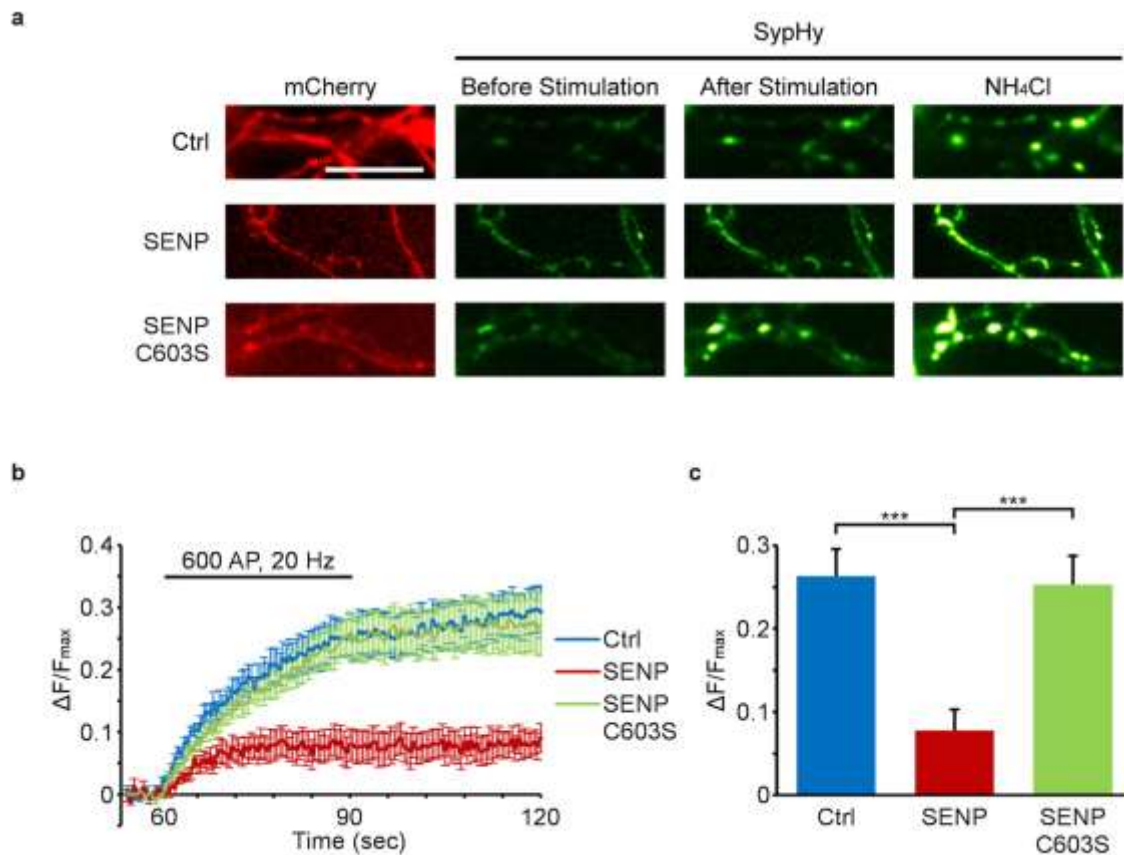

## Supplementary Figure 4

### SENP expression in hippocampal neuron decreases overall SV exocytosis

**a)** Representative images showing Synla knockdown and molecular replacement in DIV 12 hippocampal neuron and imaged live 3 days later. SypHy protocol was identical to figure 2a. Images are representative of the SypHy signal before and after stimulation ( $t = 0$  sec and 90 sec respectively), and after  $\text{NH}_4\text{Cl}$  perfusion ( $t = 180$  sec). mCherry Control (Ctrl,  $n=8$ ), SENP expression ( $n=8$ ), and inactive SENP C603S ( $n=8$ ). Scale bar = 10  $\mu\text{m}$

**b)** SypHy fluorescence data were normalized to the maximum SypHy signal obtained after  $\text{NH}_4\text{Cl}$  application ( $\Delta F/F_{max}$ ) and plotted as the mean  $\pm$  SEM.

**c)** Quantification of data shown in **b)** plotted as the mean  $\pm$  SEM of the average  $\Delta F/F_{max}$   $t = 90 - 100$  sec\*\*\*:  $p < 0.001$ , one-way ANOVA, Post-hoc test with Bonferroni correction.

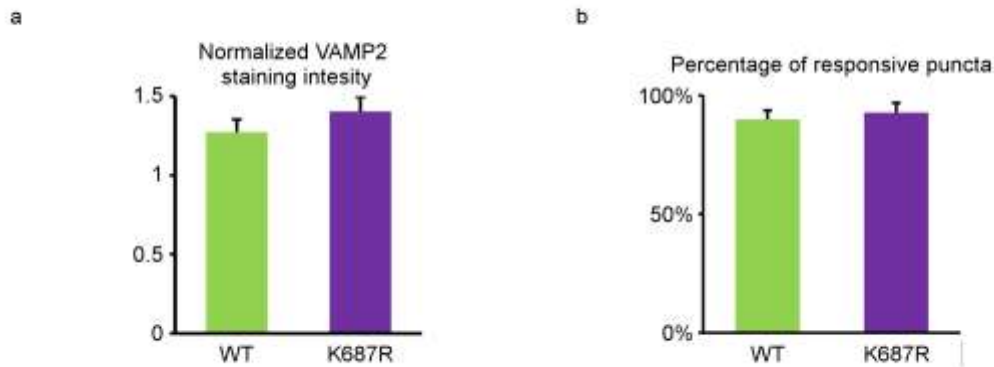

### Supplementary Figure 5

**a)** No difference in staining intensity of SV protein (VAMP2) between GFP-Syn1a (n=14 cells) and GFP-Syn1a K6987R (n=15 cells) positive puncta, normalized against intensity of corresponding bassoon staining to account for variation in size of presynaptic terminal. Data are the mean  $\pm$  SEM. Unpaired Student's t-test. This suggests that the K687R mutant does not alter SV total size.

**b)** No difference between number of responsive puncta between GFP Syn1a-WT (n=9) or K687R (n=12) in the dispersion and re-clustering assay. Data plotted as the mean  $\pm$  SEM. Number of responsive puncta were counted and normalized against total number of puncta. No significance differences were observed, unpaired Student's t-test. This suggests that under non-knockdown background, K687R mutant have similar association to SVs as wildtype Syn1a.

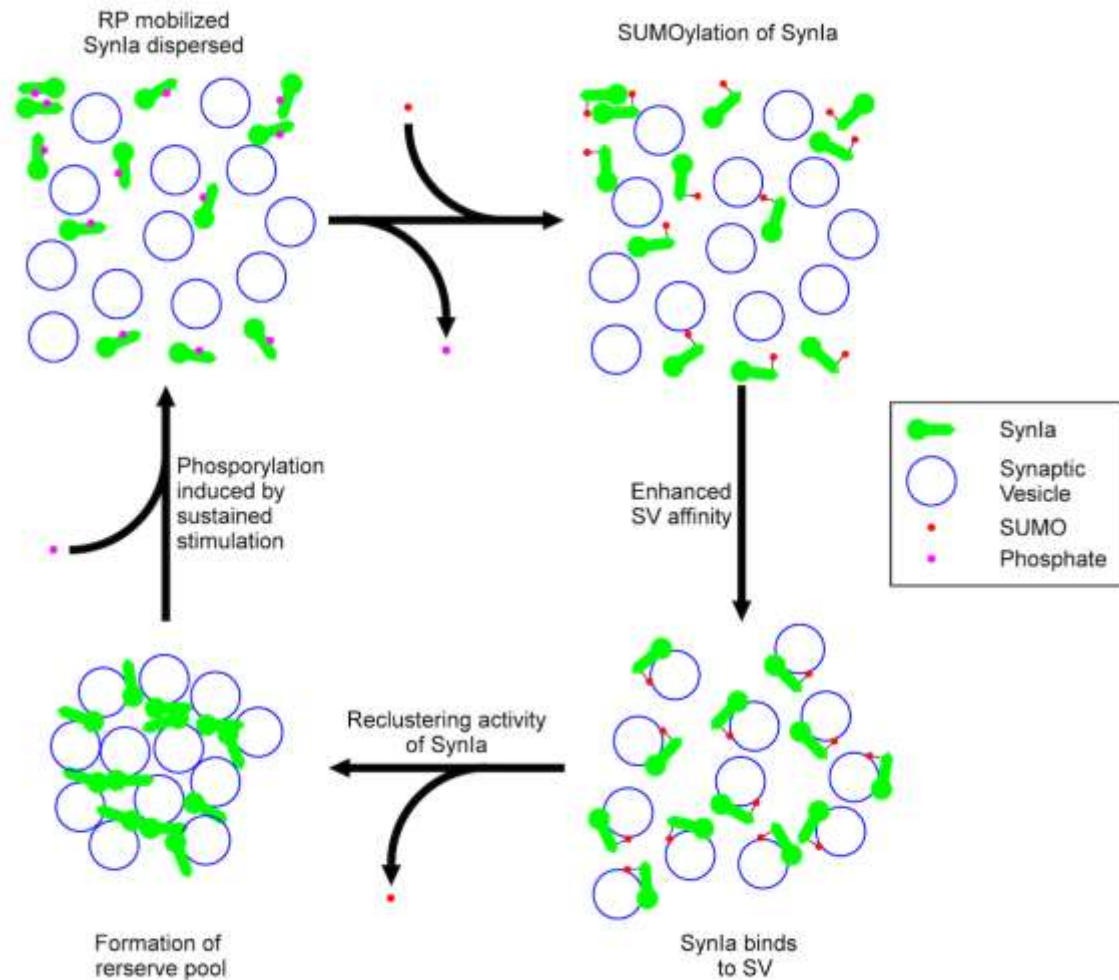

### Supplementary Figure 6

**Graphical representation of the hypothesized functional mechanism of Synla SUMOylation** During sustained stimulation, Synla dissociates from SVs due to phosphorylation by CamKII and PKA. Synla is subsequently dephosphorylated and SUMOylated. SUMOylation enhances Synla SV affinity, likely due to additional protein interactions of SUMO with SV proteins. SV-Synla binding remains stable after SUMO deconjugation. SV bound with Synla are then able to crosslink and anchor to the actin cytoskeleton, clustering to reform the recycling pool.

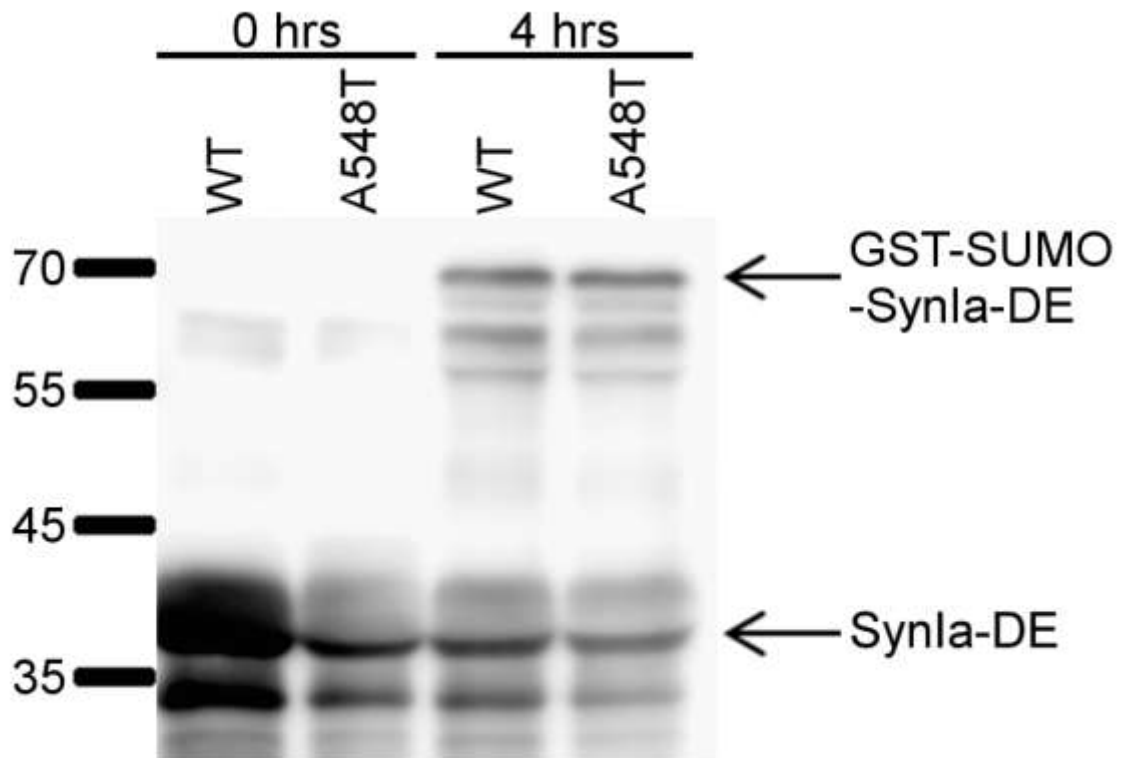

**Supplementary Figure 7**

**No difference observed in *in vitro* SUMOylation assay between wildtype and A548T SynlaDE.** GST-SUMO, His-Ubc9, SAE1/2, SynlaDE and SynlaDE A548T mutant are bacterially expressed and purified. SynlaDE, GST-SUMO1, His-Ubc9 and GST-SAE1/2 were then mixed in molar ratio of 1 : 2 : 1 : 0.01, in 25 mM Tris-HCl, 150 mM NaCl, 2 mM DTT, 10 mM MgCl<sub>2</sub>, 5 mM ATP, pH 7.5. The reactions were incubated at 37°C for 4 hours, and analysed with anti-Syn1 western blot.

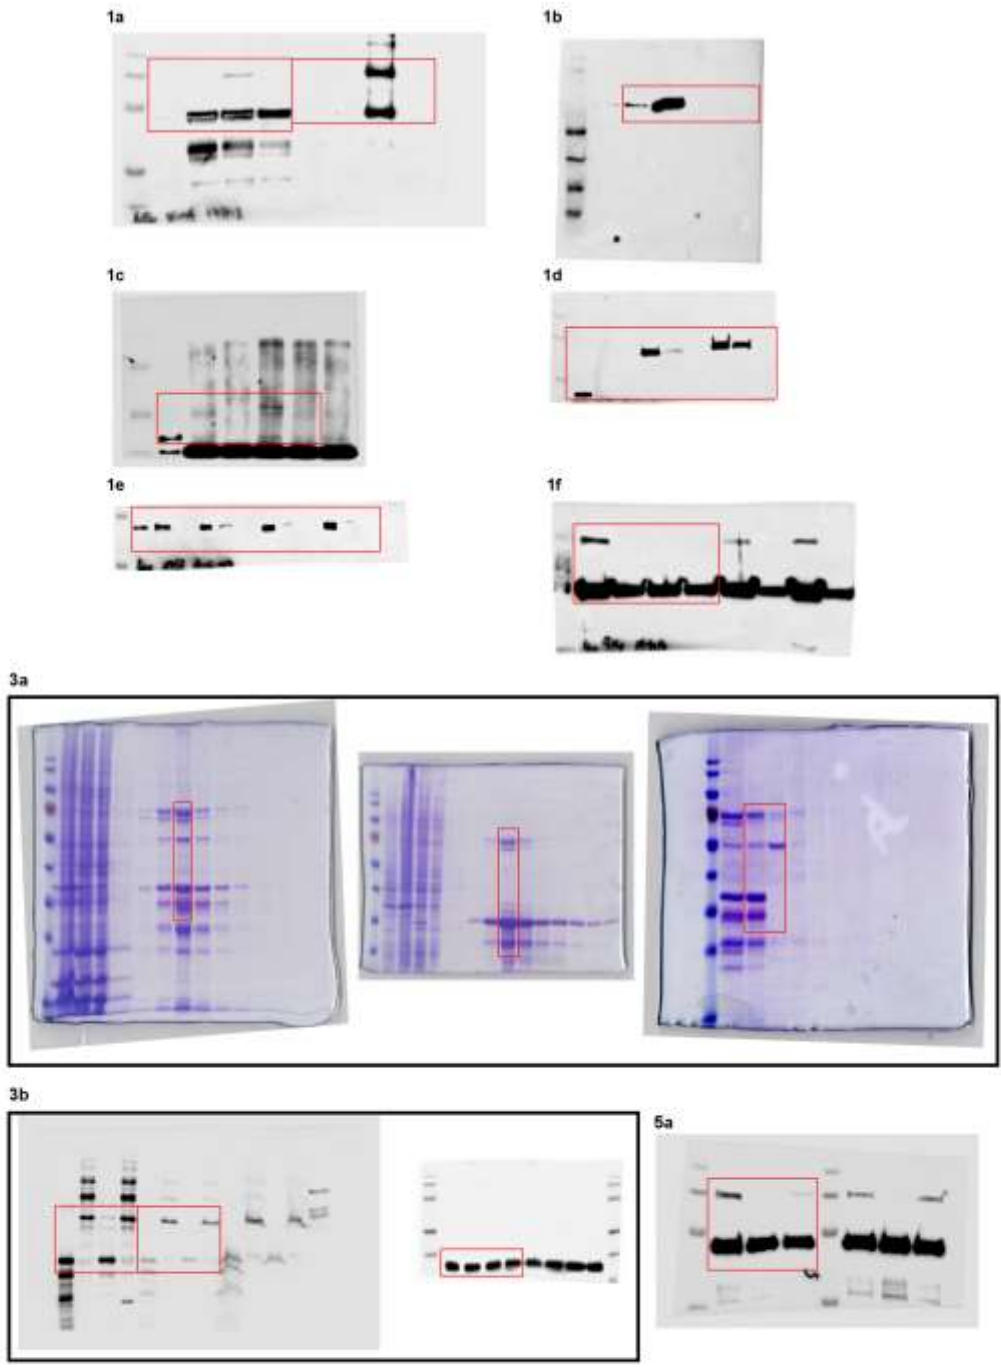

**Supplementary Figure 8**

**Original (uncropped) blots and gels.**

Cropped areas used are indicated with red boxes.
